# Supplementary figures and images for: Cancer as a metabolic disease
Source: Springer Nature journal article supplement (doi:10.1186/1743-7075-7-7), 2010-01-01

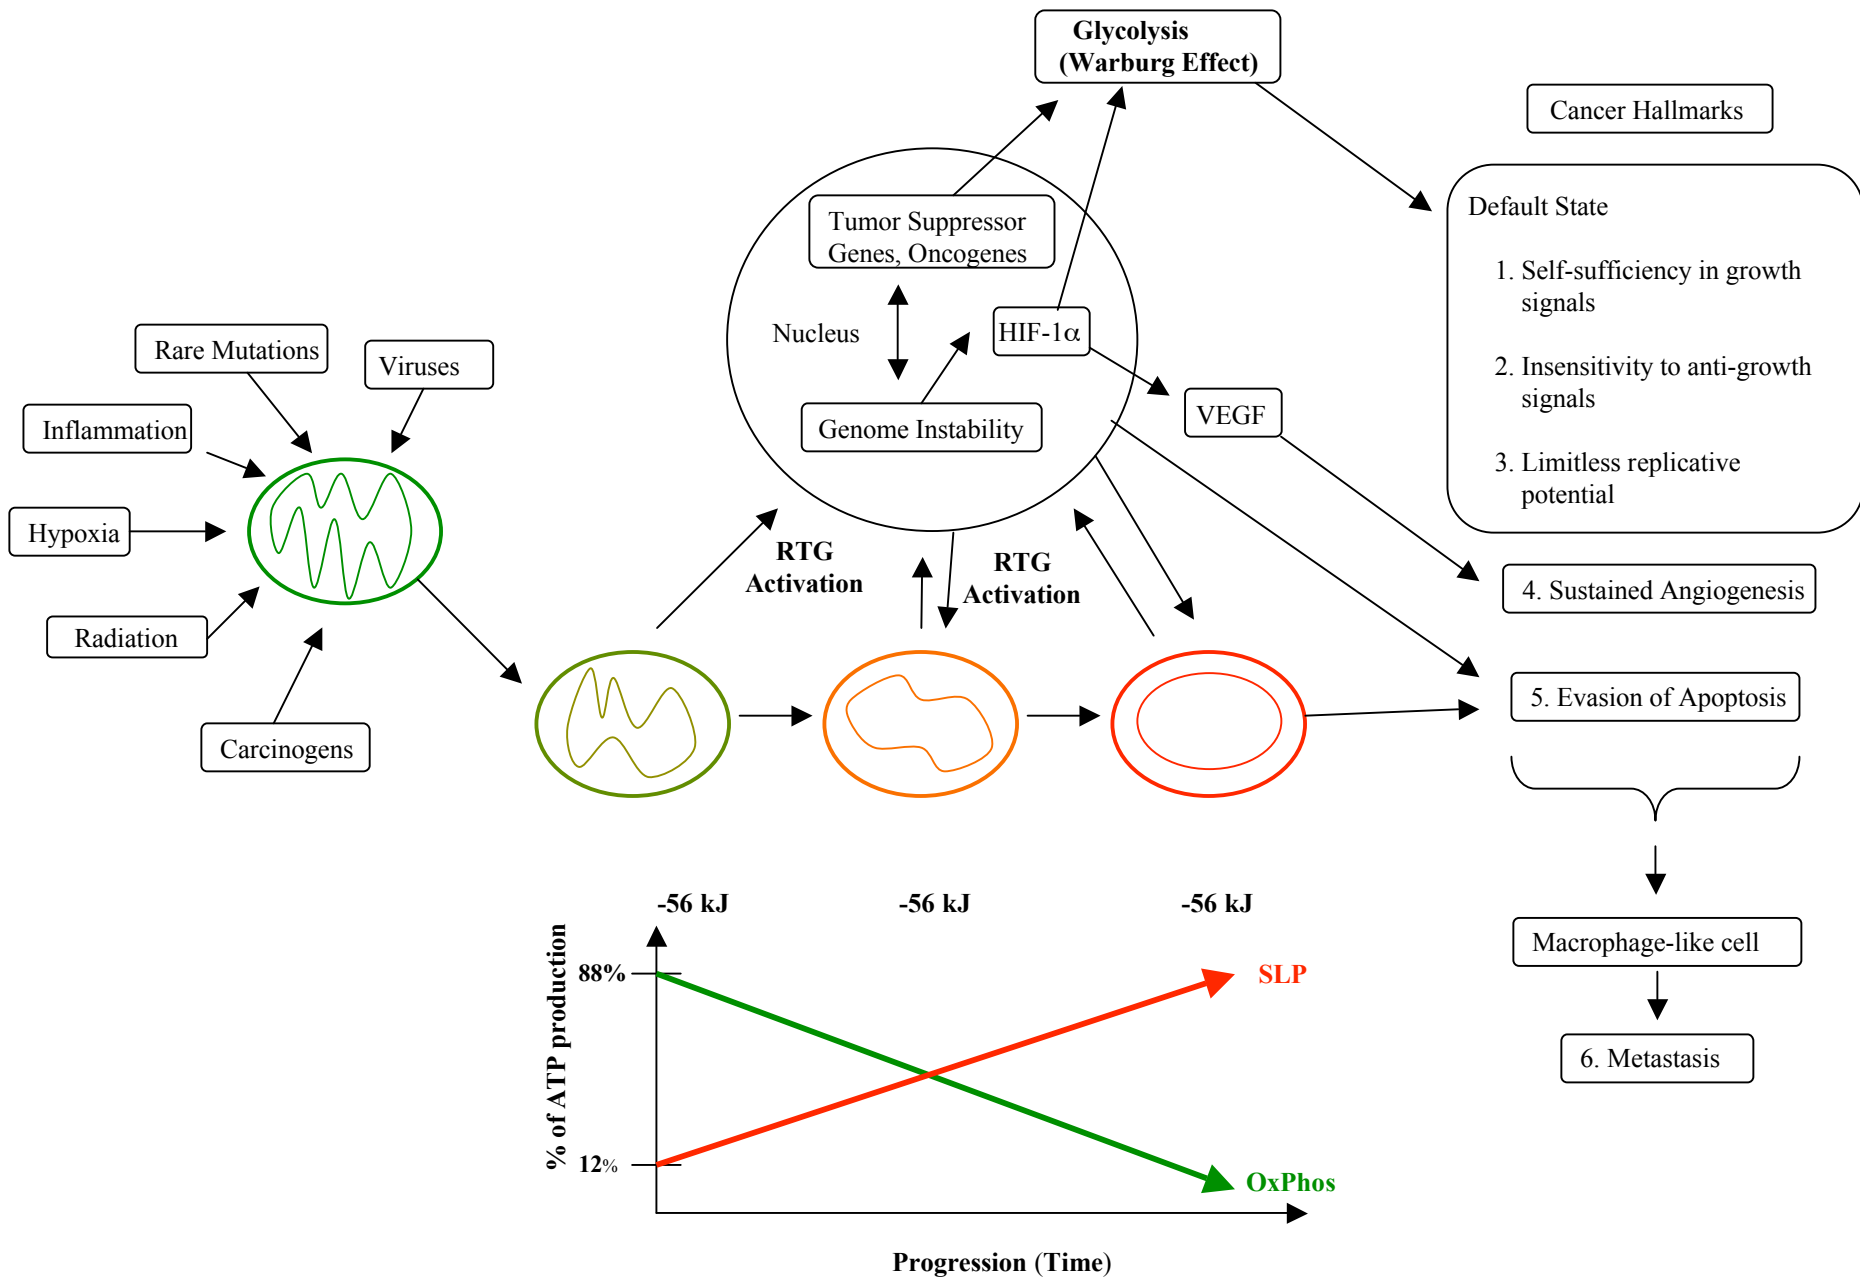

Supplement: 12986_2009_219_MOESM2_ESM.pdf [file 12986_2009_219_MOESM2_ESM.pdf]
